# Supplementary material
Source: publisher figshare collection journal article supplement (https://wiley.figshare.com/articles/dataset/_/3518594)
Supplement: Supplementary file 1 [file 1 › appendix-B.htm]

Ecological Archives A023-057-A2


*Ecological Archives* A023-057-A2

Shana M. McDermott, Rebecca E. Irwin, Brad W. Taylor. 2013. Using economic instruments to develop effective management of invasive species: insights from a bioeconomic model. *Ecological Applications* 23:1086–1100. http://dx.doi.org/10.1890/12-0649.1

Appendix B. Theoretical comparison of collective vs. independent management for the planting of natives.

> View / download PDF.


---

[Back to A023-057]
